# Supplementary material for: Relative Importance of Demographic, Socioeconomic and Health Factors on Life Expectancy in Low- and Lower-Middle-Income Countries
Source: PubMed Central journal article supplement (PMC3956691; doi:10.2188/jea.je20130059), 2014-03-05
Supplement: je-24-117-s001.pdf [file je-24-117-s001.pdf]

**eTable 1.** Descriptions and sources of study variables

| <b>Variable</b>                                  | <b>Description</b>                                                                                                                                                                                                                                                                                                                                                      | <b>Source</b> |
|--------------------------------------------------|-------------------------------------------------------------------------------------------------------------------------------------------------------------------------------------------------------------------------------------------------------------------------------------------------------------------------------------------------------------------------|---------------|
| Gross national income (GNI) per capita ( $X_1$ ) | GNI PPP per capita is gross national income in purchasing power parity (PPP) divided by mid-year population. GNI PPP refers to gross national income converted to “international” dollars using a purchasing power parity conversion factor. International dollars is the amount of goods and services one could buy in the United States with a given amount of money. | 26            |
| Mean years of schooling ( $X_2$ )                | Average number of years of education among adults 25 years or older, converted from educational attainment levels (using the official durations of each level)                                                                                                                                                                                                          | 26            |
| Adolescent fertility rate ( $X_3$ )              | Number of births to women aged 15-19 years per 1000 women aged 15-19 years                                                                                                                                                                                                                                                                                              | 26            |
| Total fertility rate (TFR) ( $X_4$ )             | Average number of children born to a woman, assuming that current age-specific birth rates remained constant throughout her childbearing years (age 15-49 years)                                                                                                                                                                                                        | 27            |
| Physician density ( $X_5$ )                      | Number of physicians per 10,000 population                                                                                                                                                                                                                                                                                                                              | 25            |
| HIV prevalence rate ( $X_6$ )                    | Estimated number of HIV-positive adults aged 15-49 years per 100 population                                                                                                                                                                                                                                                                                             | 25            |
| Life expectancy ( $X_7$ )                        | Average number of years a newborn infant can expect to live under current mortality levels                                                                                                                                                                                                                                                                              | 27            |
