# Supplementary material for: Relative Importance of Demographic, Socioeconomic and Health Factors on Life Expectancy in Low- and Lower-Middle-Income Countries
Source: PubMed Central journal article supplement (PMC3956691; doi:10.2188/jea.je20130059), 2014-03-05
Supplement: je-24-117-s002.pdf [file je-24-117-s002.pdf]

**eTable 2.** Countries analyzed, by geographic region<sup>a</sup> (N=91)

| Region                                 | No.       | Country                                                                                                                                            |                                                                          |
|----------------------------------------|-----------|----------------------------------------------------------------------------------------------------------------------------------------------------|--------------------------------------------------------------------------|
|                                        |           | Low income                                                                                                                                         | Lower middle income                                                      |
| <b>Africa</b>                          | <b>44</b> |                                                                                                                                                    |                                                                          |
| Eastern Africa                         | 15        | Burundi, Comoros, Eritrea, Ethiopia, Kenya, Madagascar, Malawi, Mozambique, Rwanda, Somalia, Uganda, United Republic of Tanzania, Zambia, Zimbabwe | Djibouti                                                                 |
| Central Africa                         | 7         | Central African Republic, Chad, Democratic Republic of the Congo                                                                                   | Angola, Cameroon, Congo, Sao Tome and Principe                           |
| Northern Africa                        | 4         |                                                                                                                                                    | Egypt, Morocco, Sudan, Tunisia                                           |
| Southern Africa                        | 2         |                                                                                                                                                    | Lesotho, Swaziland                                                       |
| Western Africa                         | 16        | Benin, Burkina Faso, Gambia, Ghana, Guinea, Guinea-Bissau, Liberia, Mali, Mauritania, Niger, Sierra Leone, Togo                                    | Cape Verde, Côte d'Ivoire, Nigeria, Senegal                              |
| <b>Oceania</b>                         | <b>6</b>  |                                                                                                                                                    | Kiribati, Micronesia, Papua New Guinea, Samoa, Tonga, Vanuatu            |
| <b>Asia</b>                            | <b>26</b> |                                                                                                                                                    |                                                                          |
| Eastern Asia                           | 4         | Democratic People's Republic of Korea                                                                                                              | China, Maldives, Mongolia                                                |
| Southern Asia                          | 7         | Bangladesh, Myanmar, Nepal                                                                                                                         | Bhutan, India, Pakistan, Sri Lanka                                       |
| Southeast Asia                         | 6         | Cambodia, Lao People's Republic                                                                                                                    | Indonesia, Philippines, Thailand, Vietnam                                |
| Western Asia                           | 9         | Afghanistan, Kyrgyzstan                                                                                                                            | Armenia, Georgia, Iraq, Jordan, Syrian Arab Republic, Timor-Leste, Yemen |
| <b>Latin America and the Caribbean</b> | <b>10</b> |                                                                                                                                                    |                                                                          |
| Caribbean                              | 1         | Haiti                                                                                                                                              |                                                                          |
| Central America                        | 5         |                                                                                                                                                    | Belize, El Salvador, Guatemala, Honduras, Nicaragua                      |
| South America                          | 4         |                                                                                                                                                    | Bolivia, Ecuador, Guyana, Paraguay                                       |
| <b>Southern and Eastern Europe</b>     | <b>0</b>  |                                                                                                                                                    |                                                                          |
| Eastern Europe                         | 0         |                                                                                                                                                    |                                                                          |
| Southern Europe                        | 0         |                                                                                                                                                    |                                                                          |
| <b>Eurasia</b>                         | <b>5</b>  | Tajikistan                                                                                                                                         | Republic of Moldova, Turkmenistan, Ukraine, Uzbekistan                   |

<sup>a</sup>Based on the geographic regions specified by the United Nations
